# Supplementary material
Source: publisher figshare collection journal article supplement (https://acs.figshare.com/ndownloader/files/4301332)

**Figure 1S.** Computer modeling of compound docking to the estrogen receptor ER $\alpha$  with **1** (A) and **2** (B).

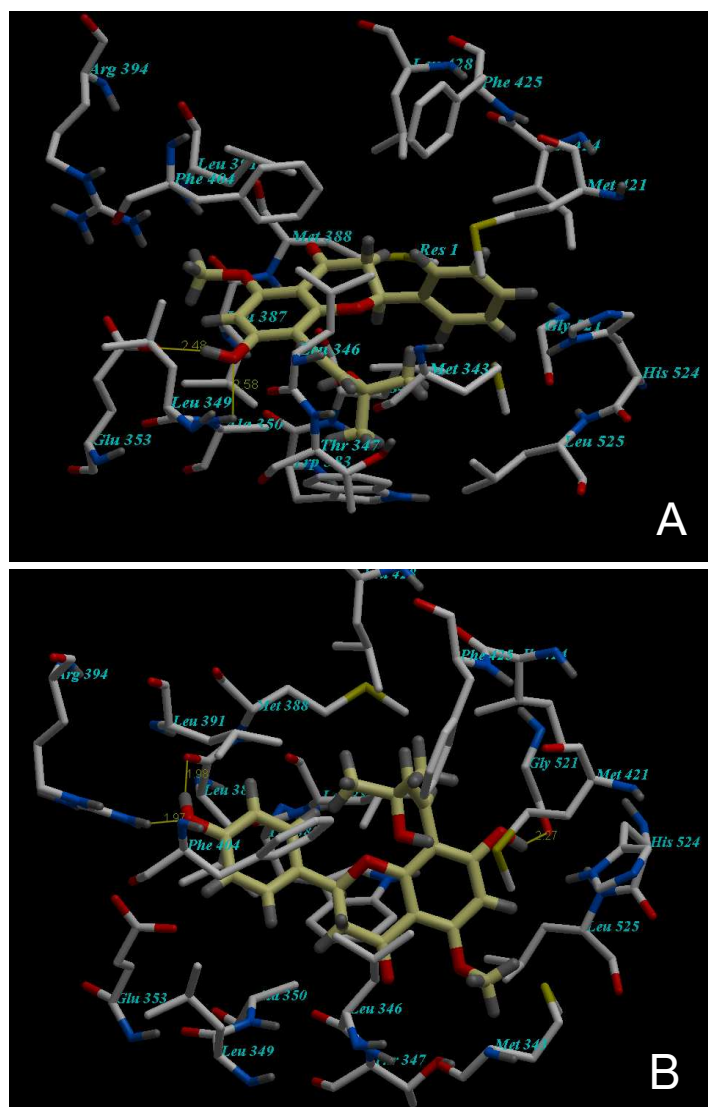

Supplement: Supplementary file 1 [file 4301332]
